# Supplementary material for: Inhibition of Tumor Growth via Systemic siRNA Delivery Using Reducible Bile Acid-Conjugated Polyethylenimine
Source: MDPI journal article supplement (doi:10.3390/polym10090953), 2018-08-27
Supplement: s1 [file s1]

Supplementary information

# Inhibition of Tumor Growth via Systemic siRNA Delivery Using Reducible Bile Acid-Conjugated Polyethylenimine

Yue Yin, Jung Eun Lee, Nak Won Kim, Jong Han Lee, Su Yeon Lim, E Seul Kim, Ji Won Park, Min Sang Lee \* and Ji Hoon Jeong \*

<sup>1</sup> School of Pharmacy, Sungkyunkwan University, Suwon 16419, Republic of Korea

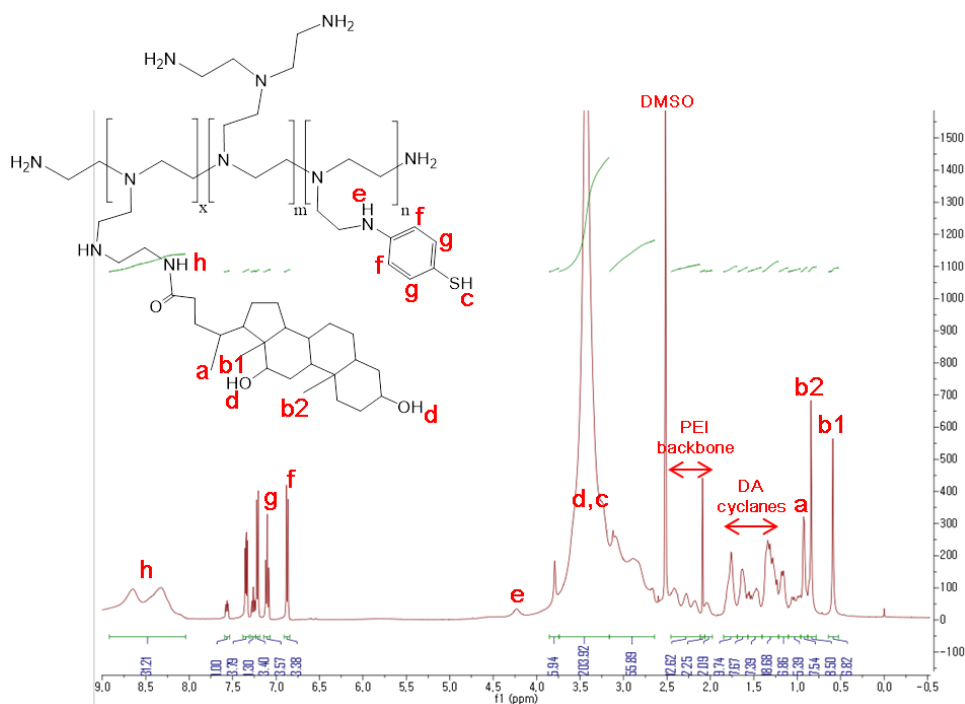

**Figure S1.** <sup>1</sup>H NMR spectrum of thiophenol (TP)(3)-deoxycholic acid (DA)-polyethylenimine (PEI) in dimethyl sulfoxide (DMSO).

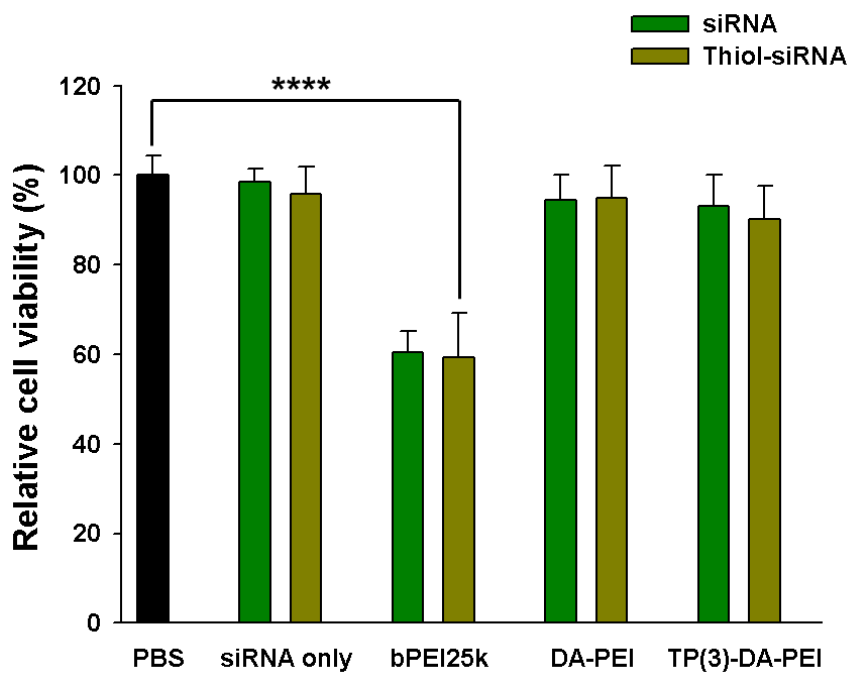

**Figure S2.** Cytotoxicity of polyplexes formed between small interfering RNA (siRNA) (or thiol-siRNA) and bPEI25k (polymer/siRNA weight ratio = 1), DA-PEI (weight ratio = 3), or TP(3)-DA-PEI (weight ratio = 3) in A549 cells. The fraction of viable cells was measured using 3-(4,5-dimethyl-2-thiazolyl)-2,5-diphenyl-2H-tetrazolium bromide (MTT) assay. The results are presented as means  $\pm$  SD and analyzed using Student's t-test ( $n = 6$ , \*\*\*\*  $p < 0.0001$ ).
